# Supplementary material for: Solving problems collectively in nuclear waste governance
Source: Copernicus journal article supplement (doi:10.5194/sand-2-267-2023), 2023-09-06
Supplement: Supplementary file 1 [file sand-2-267-2023-supplement.pdf]

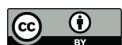

## *Supplement of*

# **Solving problems collectively in nuclear waste governance**

**Stefanie Enderle and Elske Bechthold**

*Correspondence to:* Stefanie Enderle ([stefanie.enderle@kit.edu](mailto:stefanie.enderle@kit.edu))

The copyright of individual parts of the supplement might differ from the article licence.

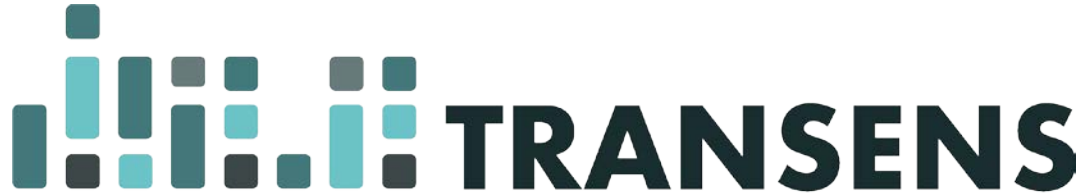

TRANSDISZIPLINÄRE FORSCHUNG ZUR ENTSORGUNG  
HOCHRADIOAKTIVER ABFÄLLE IN DEUTSCHLAND

## Solving problems collectively in nuclear waste governance

Stefanie Enderle and Elske Bechthold

safe<sup>ND</sup> 2023, Berlin, 13th September 2023

Session 18 "Legal bases for safety related decisions and governance aspects in  
international comparison"

# WHO WE ARE AND WHAT WE WOULD LIKE TO CONTRIBUTE TO THIS SESSION

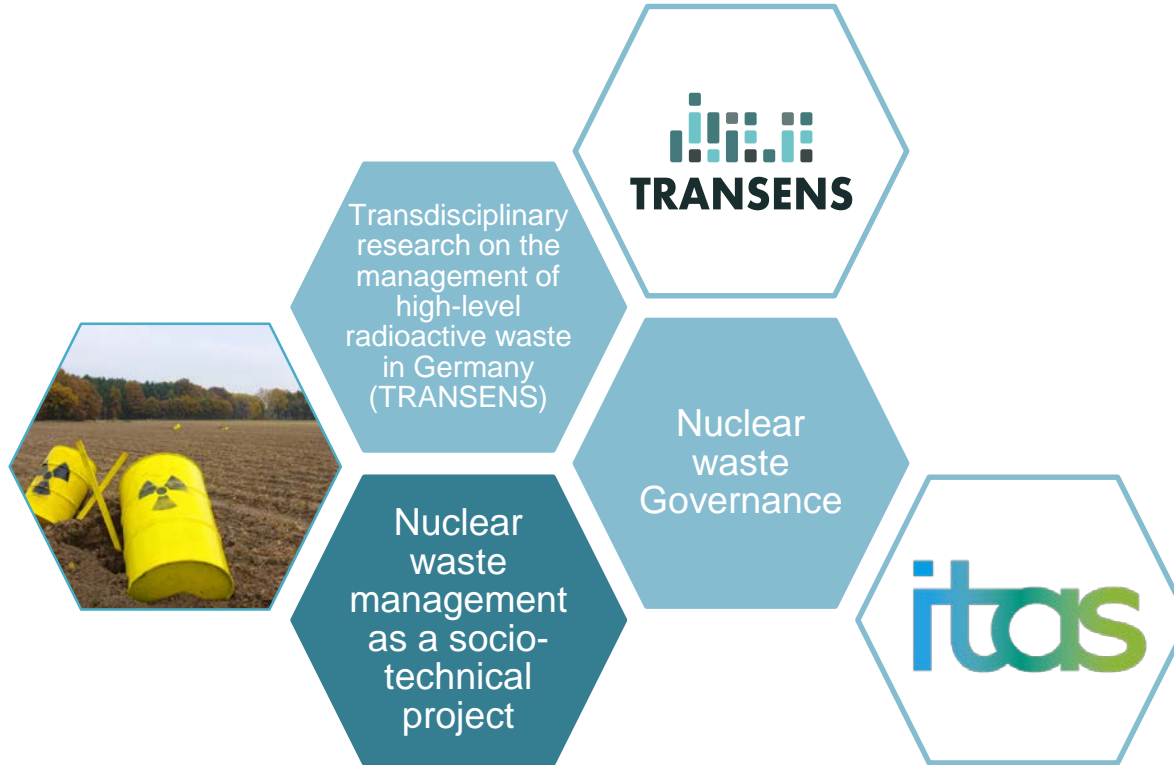

## Method

- Design Thinking (Pearce 2020)

## Participants

- 12 „Insider“

## Approach

- develop common understanding of problem
- develop concrete solutions

## Goal

- Trust-building framework to develop a collaborative solution

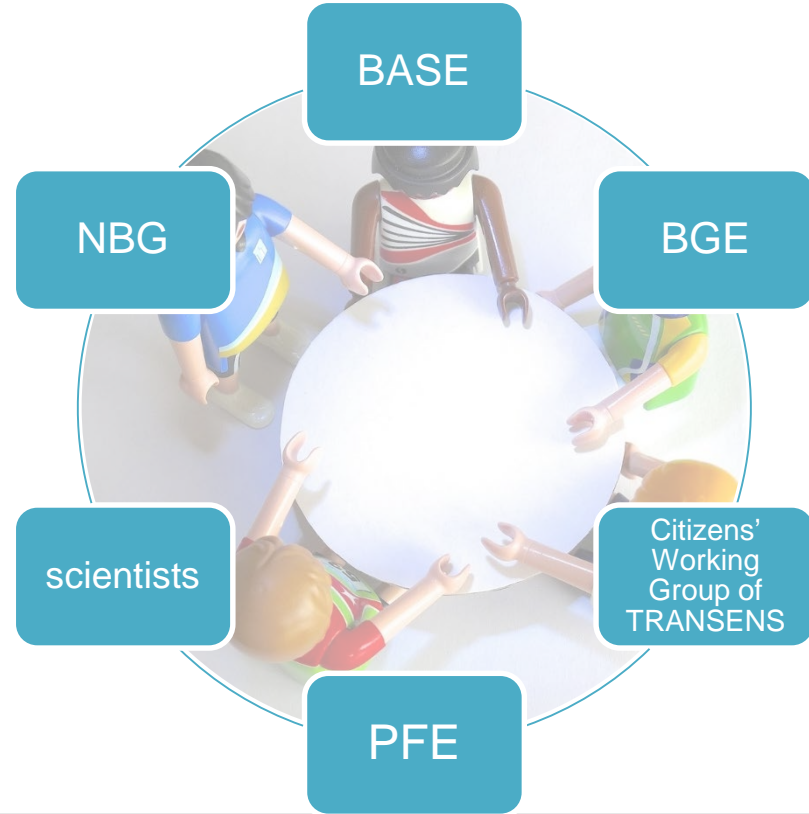

# WHAT THEMATIC FRAMEWORK DID WE SET AND WHAT GOAL DID WE PURSUE?

## Framework

- Deep geological repository
- Site selection act (StandAG) with the attributes 'science-based', 'participatory', 'transparent', 'self-questioning' and 'learning'

## Focus

- On the entire disposal path (c.f. Scheer et al. 2023)
- Into the further future

## Goal

- Thinking in Alternatives (Grunwald 2019)
- Decisions, Challenges, Problems...

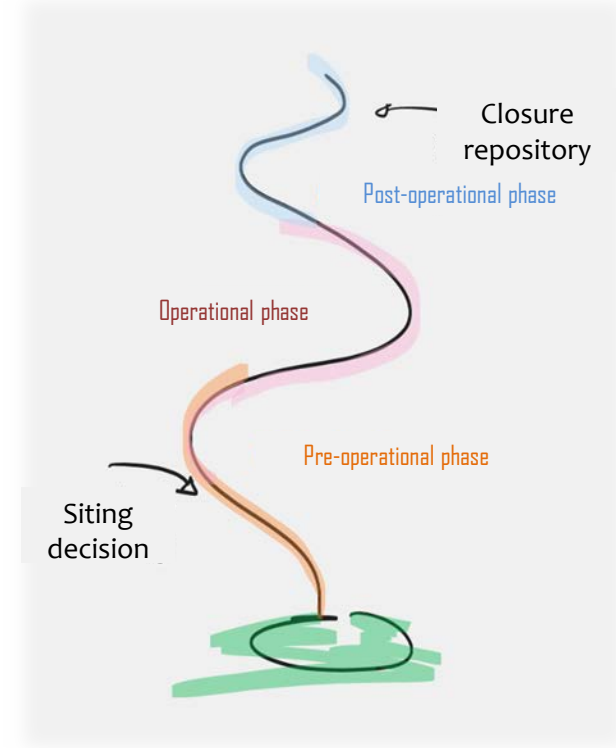

# RELATIONSHIP BETWEEN „FUTURE“ AND „SAFETY“ (1)

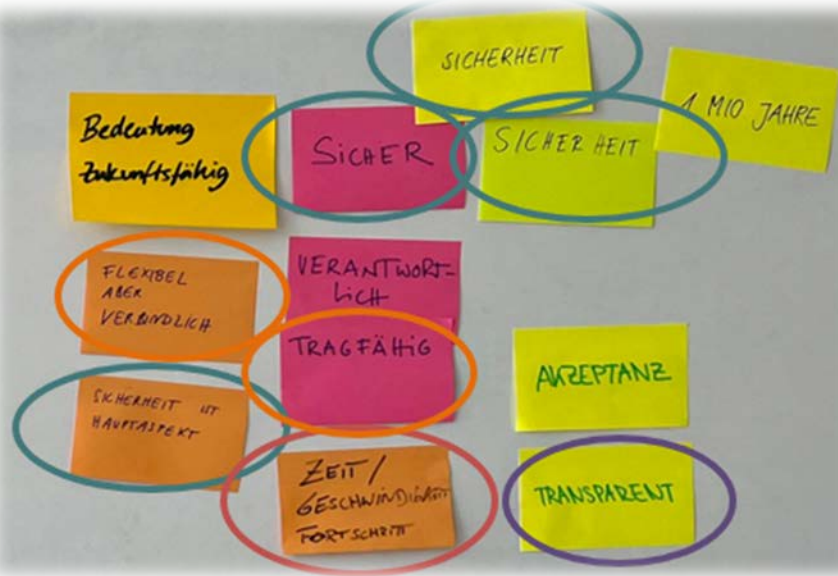

## Future-proof solutions should

- Promote **safety**,
- Keeping the **time factor** in view
- and, through **transparent** procedures
- **flexible** and **binding**
- to arrive at **viable** decisions

## Observation

- "safety" refers to an superior goal
- But no further differentiation of the meaning

# RELATIONSHIP BETWEEN „FUTURE“ AND „SAFETY“ (2)

## A disposal path is future-proof

- goal-oriented ("leads safely to the goal"),
- safer,
- is **science-based**

## Aspects included

- Trust-building
- **avoidance of regressions**
- not deferrable

## Observation

- safety as a variable to be increased ("safer")

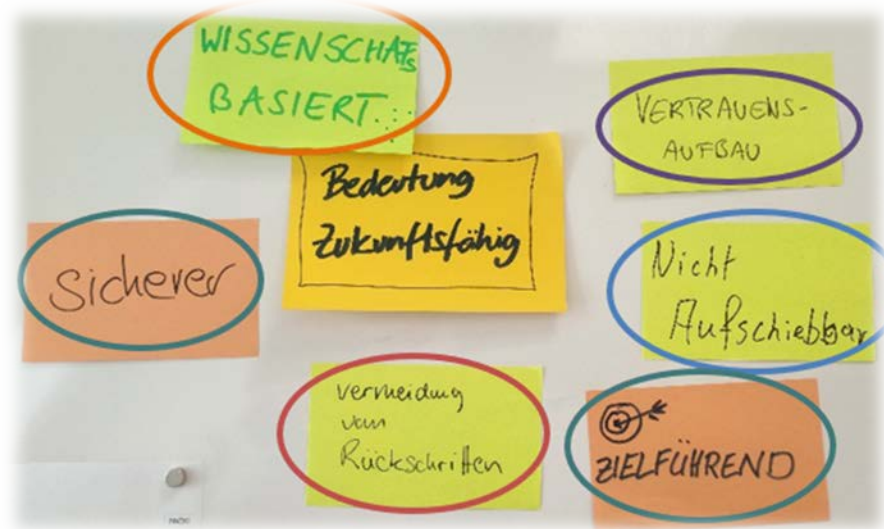

1 Safety as a term is suitable to describe a superior goal.

2 Safety is something to be achieved.

3 Other goals are compatible with standards from the Site Selection Act:  
science-based, transparent.

4 Other relevant topics: Trust, flexibility, the factor time

# WHAT PROBLEMS HAVE BEEN IDENTIFIED? (1)

## Central topic: Communication

- ❖ Tension between science-based and transparent and participative
- ❖ Improvement of communication between stakeholders, science and public
- ❖ Scientific topics must be understandable, accessible, structured but not highly simplified

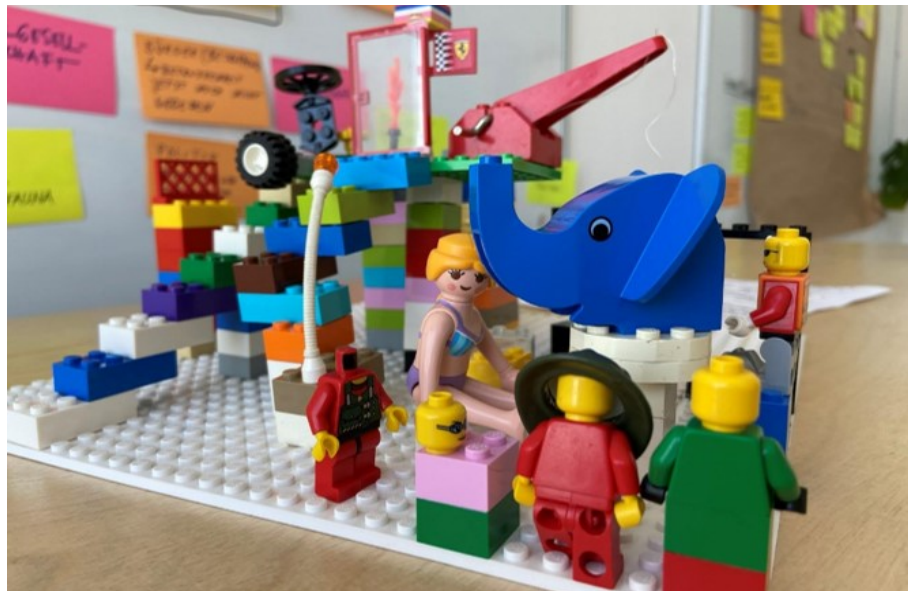

# WHAT PROBLEMS HAVE BEEN IDENTIFIED? (2)

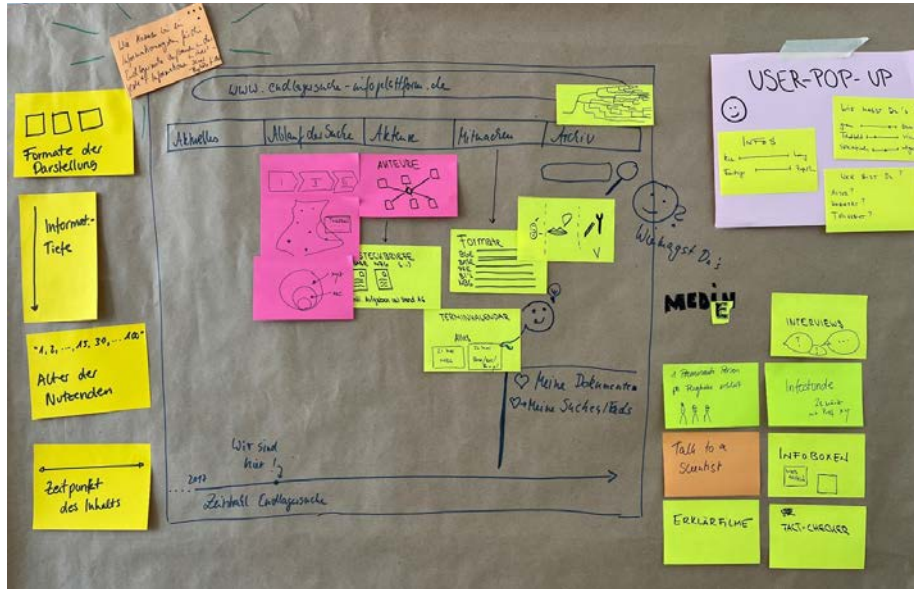

## Information platform

- ❖ Revision of the information platform „Repository Search“
- ❖ Pluralistic approach, interactive communication
- ❖ Displaying of scientific results in different levels of language and comprehension

# WHAT PROBLEMS HAVE BEEN IDENTIFIED? (3)

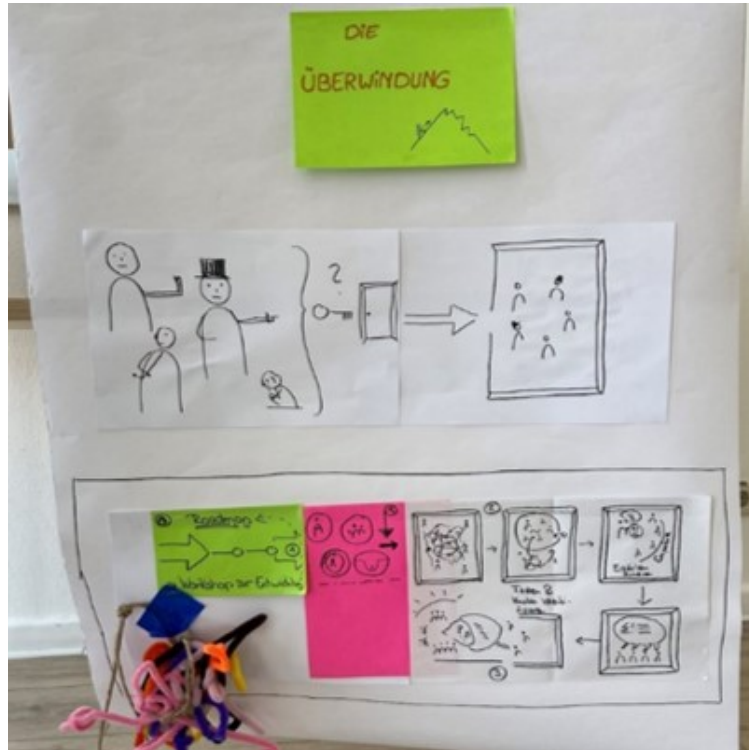

## Central topic: Conflicts

- ❖ „The Overcoming“ – format for a protected space
- ❖ Past experiences burden the present
- ❖ Generational issue: conflict resolution is important to avoid disruptions and delays
- ❖ Formats for conflict management are necessary
- ❖ Improvement of the collaborative relationships between stakeholders

1

## Current problems predominate

- Future thinking was not possible because of the present problems

2

## Strong status quo orientation

- StandAG as a given legal framework → challenges „thinking outside the box“

3

## Communication and conflicts as central problem areas

- Improvement of collaborative relations as ‚conditions for success‘ in the Site selection procedure

1

## Current problems predominate

- Future thinking was not possible because of the present problems

2

## Strong status quo orientation

- StandAG as a given legal framework → challenges „thinking outside the box“

3

## Communication and conflicts as central problem areas

- Improvement of collaborative relations as conditions for success for the Site selection procedure

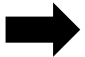

„Safety“ as a shared goal

---

„Primacy of safety“ (cf. German Commission on the Storage of High-Level Radioactive (Endko), StandAG §1) is recognized and shared

---

All decisions to be made must always take safety into account

---

Dominance of technical-engineering understanding of safety?

# WHY AN EXPANDED UNDERSTANDING OF SAFETY?

---

"Safety should be understood as a construct that is not provided by technical solutions alone, but arises in interaction with human actions" (Brunnengräber et al. 2021).

---

Nuclear waste disposal as a socio-technical system

---

Geoscientific and engineering approaches must be coordinated with social expectations and political action

---

To achieve the best possible (technical) safety, the procedure must be the best possible

---

Balance between the technical-engineering solution, required time and the quality of the decision-making process with public participation

---

## Resilient

- to have the ability to withstand disturbances
- respond to current changes, monitor critical situations, anticipate future events, learn from the past (cf. Röhlig/Sträter 2022)

## Robust

- Stable Governance structures with options for flexible design

## Collaboration

- between the institutions or beyond the institutions with the public
- Orientation towards cooperation and collaboration (Schimank 2000)

# CONNECTING THE THEORETICAL CONSIDERATIONS WITH THE INSIGHTS FROM THE WORKSHOP

## Resilient

- Need for "anticipating future events" and "learning from the past"

## Robust

- Flexibility in public participation process was necessary (see e.g. Repository Search Forum)
- Adjustments should be discussed openly
- Status quo orientation could be an obstacle

## Collaboration

- Protected spaces for conflict resolution
- Pluralistic and accessible communication channels
- Common goals (e.g. primacy of safety) help to establish collaborative forms of cooperation (c.f. Bechthold/Enderle 2023)

## Socio-technical system of nuclear waste governance & safety means...

- paying attention to the aspects of resilience of the procedure,
- robustness of the structures and
- collaborative relationships.

## Primacy of safety & expanded understanding of safety means...

- ensuring and strengthening problem-solving abilities and the capacity to act.
- This requires repeated approaches to challenge the actors involved to break out of their habitual patterns of action.

## All safety-related considerations and decisions should...

- be made with an expanded understanding of safety in mind.
- be discussed not only within the scientific community, but with stakeholders and the public.

## THANK YOU FOR YOUR ATTENTION!

Gefördert durch:

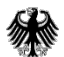

Bundesministerium  
für Umwelt, Naturschutz, nukleare Sicherheit  
und Verbraucherschutz

aufgrund eines Beschlusses  
des Deutschen Bundestages

Gefördert im  
Niedersächsischen Vorab der Volkswagenstiftung

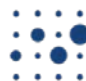

VolkswagenStiftung

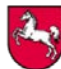

Niedersächsisches Ministerium  
für Wissenschaft und Kultur

Förderkennzeichen: 02E11849A-J

ITAS: 02E11849E

- Brunnengräber, A., Isidoro Losada, A. M., Brohmann, B., and Hocke, P.: Konzepte und Maßnahmen zum Umgang mit soziotechnischen Herausforderungen bei der Entsorgung radioaktiver Abfälle: Ein einleitender Beitrag, in: Robuste Langzeit-Governance bei der Endlagersuche: Soziotechnische Herausforderungen im Umgang mit hochradioaktiven Abfällen, edited by: Brohmann, B., Brunnengräber, A., Hocke, P., and Isidoro Losada, A.M., transcript (Edition Politik 115), Bielefeld, 11–22, <https://doi.org/10.14361/9783839456682-002>, 2021.
- Grunwald, A.: Shaping the Present by Creating and Reflecting Futures, in: Socio-Technical Futures Shaping the Present. Technikzukünfte, Wissenschaft und Gesellschaft / Futures of Technology, Science and Society, edited by: Lösch, A., Grunwald, A., Meister, M., and Schulz-Schaeffer, I., Springer VS, Wiesbaden, 17-35, 2019.
- Hocke, P., Kuppler, S., and Enderle, S.: Robuste Langzeit-Governance und Notwendigkeiten neuer Navigation. Zur Qualität soziotechnischer Gestaltungsprozesse. in: Robuste Langzeit-Governance bei der Endlagersuche: Soziotechnische Herausforderungen im Umgang mit hochradioaktiven Abfällen, edited by: Brohmann, B., Brunnengräber, A., Hocke, P., and Isidoro Losada, A.M., transcript (Edition Politik 115), Bielefeld, 363–385, <https://doi.org/10.14361/9783839456682-017>, 2021.
- Pearce, B.: Design Thinking. An iterative methodology for (re)framing problems and co-creating implementable solutions using visual thinking and prototyping. td-net toolbox profile (11). Swiss Academies of Arts and Sciences: td-net toolbox for co-producing knowledge. [www.transdisciplinarity.ch/toolbox](http://www.transdisciplinarity.ch/toolbox). doi.org/10.5281/zenodo.3717021, 2020.
- Röhlig K.-J., and Sträter O.: Das „lernende“ Verfahren – Ziele, Systemgrenzen, Akteure und Erfahrungen, in: Das „lernende“ Standortauswahlverfahren für ein Endlager radioaktiver Abfälle, edited by: Smeddinck U., Röhlig K.-J., Mbah M., and Brendler V., Berliner Wissenschafts-Verlag, Berlin, 29–41, <https://doi.org/10.35998/9783830555124>, 2022.
- Scheer, D., Becker, F., Hassel, T., Hocke, P., Leusmann, T., and Metz, V.: Trittsicherheit auf Zukunftspfaden? Ungewissheitsbewältigung bei der Entsorgung hochradioaktiver Abfälle, in: Entscheidungen in die weite Zukunft, edited by: Eckhardt, E., Becker, F., Mintzlauff, V., Scheer, D., and Seidel, R, Springer Nature VS, Wiesbaden, in preparation, 2023.
- StandAG (2017): Gesetz zur Suche und Auswahl eines Standortes für ein Endlager für hochradioaktive Abfälle (Standortauswahlgesetz -- StandAG). <https://www.bmu.de/en/law/repository-site-selection-act-standag/>, last access: 13.09.2023.
- Werle, R., and Schimank, U.: Einleitung, in: Gesellschaftliche Komplexität und kollektive Handlungsfähigkeit, edited by: Werle, R., and Schimank, U., Campus, Frankfurt/Main, 9–20, 2000.
